# Supplementary material
Source: PubMed Central journal article supplement (PMC4161143)
Supplement: jp506594f_si_001.pdf [file jp506594f_si_001.pdf]

# Supporting Information

## Interactions of Macromolecular Crowding Agents and Cosolutes with Small Molecule Substrates: Effect on Horseradish Peroxidase Activity with Two Different Substrates

*William M. Aumiller Jr., Bradley W. Davis, Emmanuel Hatzakis and Christine D. Keating\**

Department of Chemistry, The Pennsylvania State University

University Park, PA 16802, United States

\*keating@chem.psu.edu

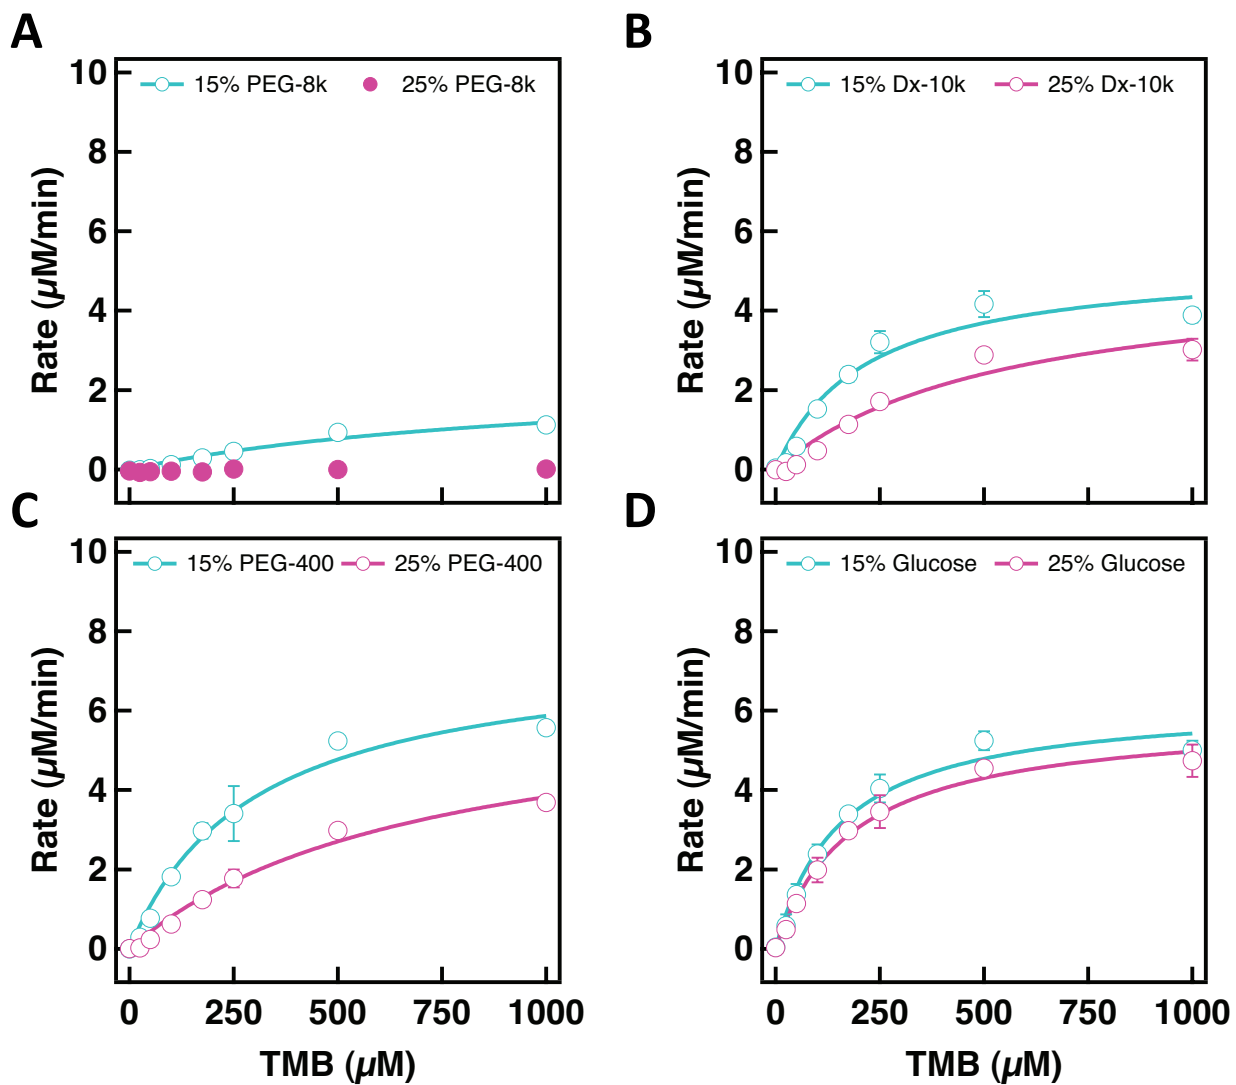

**Supporting Figure 1.** Additional kinetic traces for PEG 8k, dextran 10k, PEG 400 and glucose at 15% and 25%.

**Supporting Table 1.** Viscosity of 10%, 20%, and 30% solutions at lab temperature (17 °C) and NMR experiment temperature (25 °C).

| Media       | Wt. % | Viscosity (cP) at 17 °C | Viscosity (cP) at 25 °C |
|-------------|-------|-------------------------|-------------------------|
| Buffer      | 0     | 1.090 ± 0.003           | 0.931 ± 0.008           |
| PEG 8k      | 10    | 6.37 ± 0.04             | 5.12 ± 0.04             |
|             | 20    | 21.5 ± 0.1              | -                       |
|             | 30    | 58.6 ± 0.4              | -                       |
| Dextran 10k | 10    | 3.08 ± 0.06             | 2.55 ± 0.02             |
|             | 20    | 8.25 ± 0.08             | -                       |
|             | 30    | 23.1 ± 0.5              | -                       |
| PEG 400     | 10    | 1.709 ± 0.009           | 1.46 ± 0.01             |
|             | 20    | 2.68 ± 0.01             | -                       |
|             | 30    | 4.38 ± 0.08             | -                       |
| Glucose     | 10    | 1.53 ± 0.01             | 1.29 ± 0.02             |
|             | 20    | 2.27 ± 0.02             | -                       |
|             | 30    | 3.39 ± 0.06             | -                       |

**A**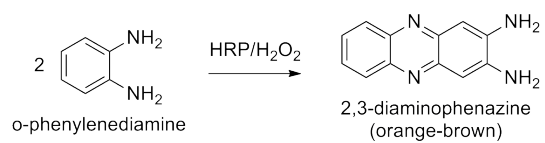**B**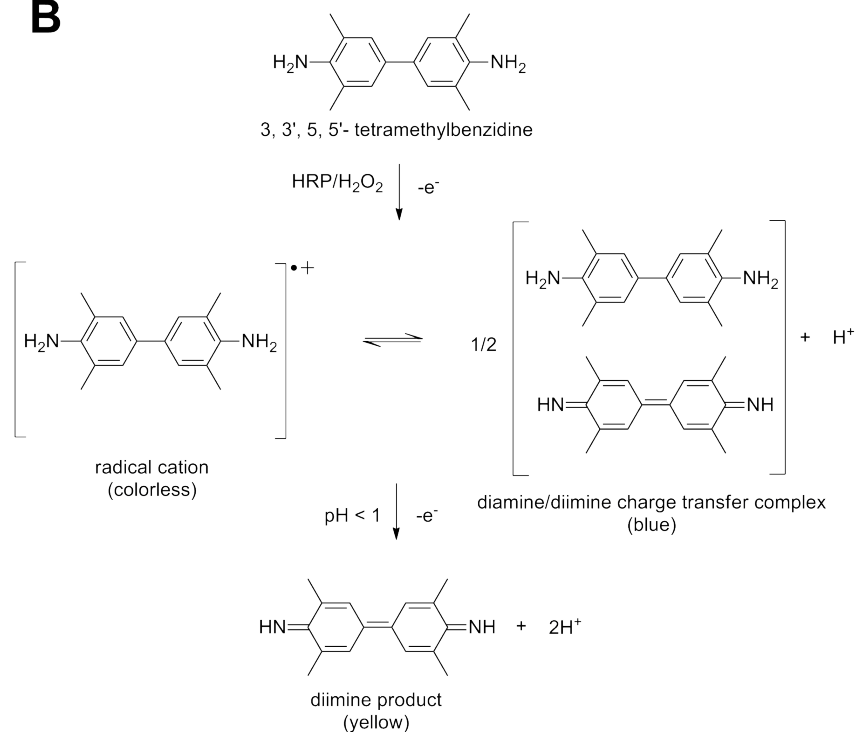

**Supporting Scheme 1.** Reaction schemes for HRP with the substrates used (A) OPD and (B)

TMB.

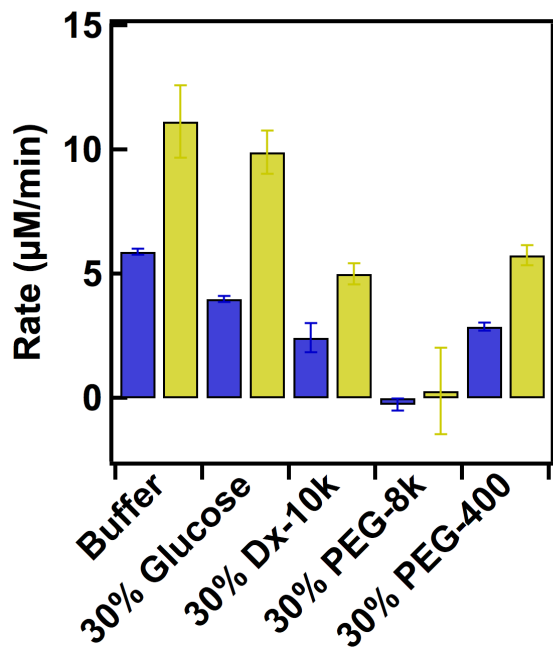

**Supporting Figure 2.** Comparison of the reaction rates for the blue product and the yellow product in each of the 30% crowding agents and cosolutes.
